# Supplementary material for: From substrate to soil in a pristine environment – pedochemical, micromorphological and microbiological properties from soils on James Ross Island, Antarctica
Source: Copernicus journal article supplement (doi:10.5194/bg-2018-488), 2018-12-14
Supplement: Supplementary file [file bg-2018-488-AC2-supplement.pdf]

1 **Response to reviewer comments on manuscript bg-2018-488: “From substrate**  
2 **to soil in a pristine environment – pedomorphological, micromorphological and**  
3 **microbiological properties from soils on James Ross Island, Antarctica”**

4  
5 We would like to thank the referees for their helpful and constructive comments, which  
6 greatly helped to improve our manuscript. We have prepared a response where we  
7 account for all points raised by the referees, as described below. We show the referees’  
8 comments in grey text, while our responses are formatted as standard text. Line  
9 indications refer to the changes in the revised manuscript.

10 **Anonymous Referee #2:**

11 Before answering the individual comments, we would like to thank the referee for taking  
12 a constructive and critical look at our manuscript.

13  
14 However, I have a problem that the intention of the manuscript is not clearly presented.  
15 From the introduction, one may understand that the manuscript is devoted to: -  
16 increase the general understanding of soils developed in the transitional zone of the  
17 eastern APR (l. 109-111), - add to the understanding of drivers of soil microbial  
18 diversity in high latitude soils (l. 125-126), - perform micromorphological studies on  
19 soils of the eastern APR (l. 132-134).

20  
21 At the end of the introduction it appears that it is all a little bit (l. 139-143). Further, the  
22 mentioned goals are not embedded into a theoretical framework. This makes it a bit  
23 hard to prepare the potential reader of what can be learned by reading the manuscript,  
24 which goes beyond a list of microorganisms. Here, the authors may consider reworking  
25 the introduction incl. the objectives chapter.

26 Many thanks for your comment. We completely rewrote the introduction according to  
27 your comment and changed almost the full introduction as follows:

28 “Therefore, soil scientific investigations became a relevant topic in Antarctic research,  
29 proving that there are actually soils in Antarctica (Jensen, 1916) and identifying soil  
30 forming processes (Ugolini, 1964).” (L. 87-89)

31  
32 “However, diverse microbial communities thrive in a variety of Antarctic habitats, such  
33 as permafrost soils (Cowan et al., 2014).” (L. 97-99)

34

35 “Local conditions determine nutrient availability in Antarctic soils (Prietzl et al., 2019).  
36 Ca, Mg, K and P contents are generally high in igneous and volcanic rocks, whereas  
37 P and N contents are highest in ornithogenic soils. Ornithogenic soils are well known  
38 in Antarctica. The World Reference Base for Soil Resources (WRB, 2014) defines  
39 ornithogenic material (from Greek ornithos, bird, and genesis, origin) as material, which  
40 is characterized by penguin deposits mainly consisting of guano and often containing  
41 a high content of gravel transported by birds (cf. Ugolini, 1972).” (L. 103-109)

42

43 “At the microscale, microbial activity such as photosynthesis and nitrogen fixation has  
44 a distinct influence on soil chemical parameters, e.g. the increase of carbon and  
45 nitrogen contents in oligotrophic soils (Ganzert et al., 2011; Cowan et al., 2011;  
46 Niederberger et al., 2015). In return, these changes in soil characteristics affect  
47 microbial community composition.” (L. 132-136)

48

49 “Since most of the non-lichenized Antarctic fungi are known to be decomposers and  
50 their abundance and distribution is limited by plant derived nutrients, and bio-available  
51 Carbon (Arenz et al., 2011), the focus of this study lies on the prokaryotic interplay with  
52 soil characteristics and soil formation.” (L 137-140)

53

54 “We selected two different soils, representing coastal soils and inland soils of James  
55 Ross Island, developed on similar substrate and at similar topographic positions, but  
56 differing in local climate conditions and nutrient contents due to their relative position  
57 towards the mainly SW-winds. The western study site (Brandy Bay –BB) is located in  
58 a windward position and is highly influenced by sea spray, while the eastern study site  
59 (Santa Martha Cove – SMC), located behind a mountain range, is located in a leeward  
60 position (Prietzl et al., 2019). This setting enables an investigation of  
61 interdependencies particularly between prokaryotic life and soil properties, since the  
62 selected soils are not influenced by vascular plants, sulfides, and penguin rookeries.  
63 With this, the main goal of our study is to identify major soil and microbiological  
64 properties in an extreme environment by combining pedochemical and  
65 micromorphological methods with microbial community studies based on high  
66 throughput sequence analyses. Thus, we will gain a better general understanding of  
67 (i) the main soil forming processes and (ii) the drivers of soil microbial diversity  
68 community structure in the eastern APR. This addresses also the question, if the

69 variance of pedogenic and microbiological properties are larger between depth  
70 increments within one profile (e.g. with different distances to the permafrost table) or  
71 between different soil profiles, i.e. due to different local environmental conditions.” (L.  
72 151-167)

73

74 A further problem that I encounter is that only two profiles are compared. I understand  
75 that at such regions of the world, it is often not possible to carry out a longer-term field  
76 study. But one must be aware that this is not a very solid basis for identifying cause-  
77 and-effect relations between the soil environment and the microbiota. Multivariate  
78 statistics could be performed, because the soil increments were considered as being  
79 independent from each other (if I understand the Bray-Curtis dissimilarity right). But at  
80 the other hand the authors also reported of water and solute flow through the profiles,  
81 thus linking the different horizons. But I think that this problem can be solved by a more  
82 careful discussion.

83 Of course, we agree that the inclusion of additional soil profiles would increase the  
84 (statistical) power of our analysis. However, since this is not possible, at least for this  
85 paper, we followed your advice and rephrased the parts in the discussion based on  
86 our multivariate statistics and observations in a more careful fashion.

87

88 Following changes were made:

89 “In case of the pedogenic oxide ratios, 12.5% of the total compositional variation could  
90 be explained, which indicates a correlation between the microbial community structure  
91 and weathering at this very initial stage of soil formation.” (L. 595-597)

92 “For example, the amount and size of microaggregates have been shown to be  
93 important regarding prokaryotic colonization, leading to genetically distinct  
94 communities as well as cell densities in different size classes of aggregates (Ranjard  
95 et al., 2000). Thus, in addition to chemophysical environmental parameters, which  
96 shape the overall prokaryotic community, the microstructure of the initial soils could  
97 have a substantial influence on species distribution.” (L. 664-668)

98

99 We also added the following paragraph to better explain how we applied statistics:

100 “Multivariate statistics were performed for soil depth increments, which we considered  
101 to be independent. However, when processes are discussed that link soil horizons,  
102 e.g. water and solute flow through the profiles, we account for the limited number of

103 two soil profiles with great care. We could not detect any environmental factors that  
104 increase or decrease the correlation between the chosen depth increments” (L. 628-  
105 632)

106

107 Also in the Abstract the goal of the study is written only in a quite vague manner. It is  
108 not clear, how the lee and luv position should impact the soil development? Was it the  
109 different input of salts with sea spray? Also the rest of the abstract is quite vague. E.g.,  
110 what are the changes in soil microstructure below 20 cm depth and what is the potential  
111 impact on water availability and matter fluxes.

112 Many thanks for this comment. We rewrote the abstract as follows:

113 “James Ross Island (JRI) offers the exceptional opportunity to study microbial driven  
114 pedogenesis without the influence of vascular plants or faunal activities (e.g. penguin  
115 rookeries). In this study, two soil profiles from JRI (one at St. Martha Cove - SMC, and  
116 another at Brandy Bay - BB) were investigated, in order to gain information about the  
117 initial state of soil formation and its interplay with prokaryotic activity, by combining  
118 pedological, geochemical and microbiological methods. The soil profiles are similar in  
119 respect to topographic position and parent material but are spatially separated by an  
120 orographic barrier and therefore represent windward and leeward locations towards  
121 the mainly south-westerly winds. These different positions result in differences in  
122 electric conductivity of the soils caused by additional input of bases by sea spray at the  
123 windward site, and opposing trends in the depth functions of soil pH and electric  
124 conductivity. Both soils are classified as Cryosols, dominated by bacterial taxa such as  
125 Actinobacteria, Proteobacteria, Acidobacteria, Gemmatimonadates and Chloroflexi. A  
126 shift in the dominant taxa was observed below 20 cm in both soils as well as an  
127 increased abundance of multiple operational taxonomic units (OTUs) related to  
128 potential chemolithoautotrophic Acidiferrobacteraceae. This shift is coupled with a  
129 change in microstructure. While single/pellicular grain microstructure (SMC) and platy  
130 microstructure (BB) is dominant above 20 cm, lenticular microstructure is dominant  
131 below 20 cm at both soils. The change in microstructure is caused by frequent freeze-  
132 thaw cycles and a relative high water content and goes along with a development of  
133 the pore spacing and is accompanied by a change in nutrient content. Multivariate  
134 statistics revealed the influence of soil parameters such as chloride, sulfate, calcium  
135 and organic carbon contents, grain size distribution, and pedogenic oxide ratios (POR)  
136 on the overall microbial community structure and explained 49.9% of its variation. The

137 correlation of the POR with the compositional distribution of microorganisms as well as  
138 the relative abundance certain microorganisms such as potentially chemolithotrophic  
139 Acidiferrobacteraceae-related OTUs could hint on an interplay between soil forming  
140 processes and microorganisms.”(L. 42-67)

141

142 I. 53: Is it fair to say that the soils are dominated by bacterial taxa, when obviously no  
143 fungal taxa were investigated? But I believe as well that fungi most likely are of minor  
144 importance in these soils.

145 Most of non-lichenized Antarctic fungi are decomposers, and their abundance and  
146 distribution is limited by plant-derived nutrients and bio-available carbon (Arenz et al.,  
147 2011). Due to the absence of plants and lichens, and the overall low organic carbon  
148 contents, we assume that microbial communities are dominated by prokaryots and  
149 especially bacteria.

150

151 To clarify this, we changed the text as follows:

152 “In this study, two soil profiles from JRI (one at St. Martha Cove - SMC, and another at  
153 Brandy Bay - BB) were investigated, in order to gain information about the initial state  
154 of soil formation and its interplay with prokaryotic activity, by combining pedological,  
155 geochemical and microbiological methods. (L. 44-47)

156 “Since most of the non-lichenized Antarctic fungi are known to be decomposers and  
157 their abundance and distribution is limited by plant derived nutrients, and bio-available  
158 Carbon (Arenz et al., 2011), the focus of this studies lies on the prokaryotic interplay  
159 with soil characteristics and soil formation.” (L. 137-140)

160

161 The introduction largely emphasis the different soil forming conditions, primarily related  
162 to climate, at different regions of Antarctica. Even though there are usually no figures  
163 in the introduction, here I would suggest to show a map of Antarctica highlighting the  
164 different areas that are mentioned in the discussion (it can be a slightly modified  
165 version of the present Fig. 1). But, of course, this also depends on whether the editors  
166 will accept this suggestion.

167 Many thanks for this remark. We replaced the satellite image of figure 1 with the  
168 following map. We suggest to mention figure 1 (L. 148) in the introduction and leave it  
169 in the methods section, because we describe there the study area more precisely.

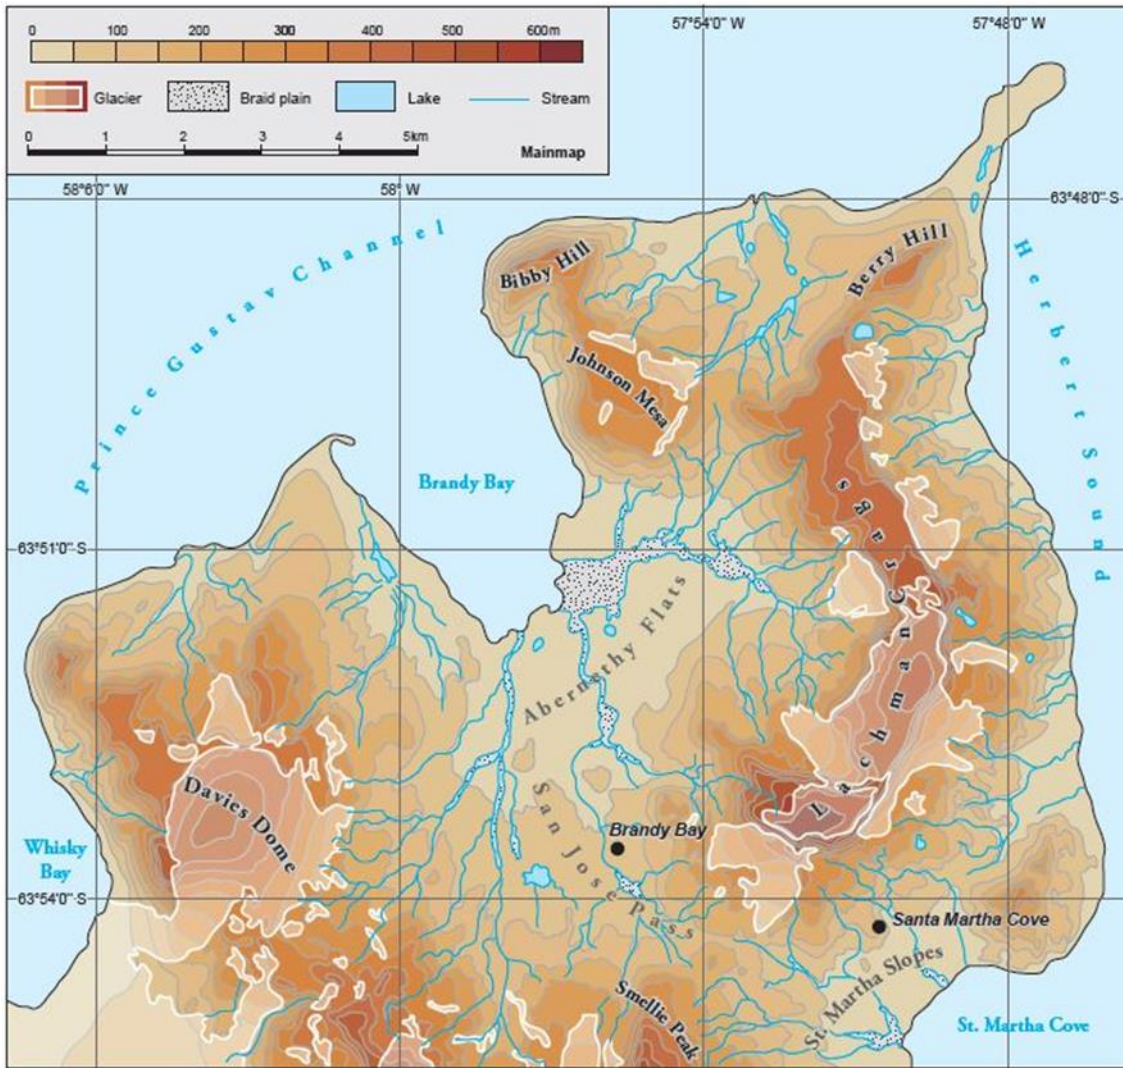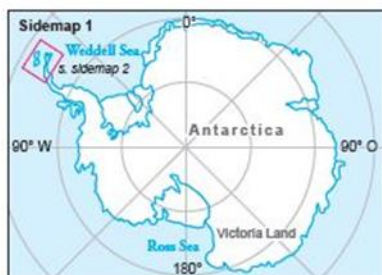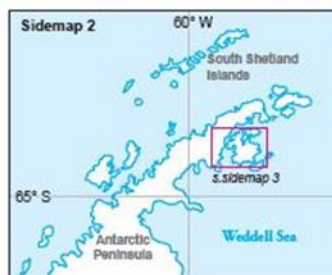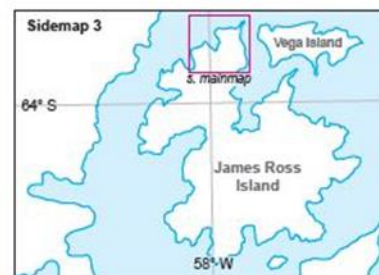

170  
 171  
 172  
 173  
 174  
 175  
 176  
 177  
 178  
 179

180 I. 123-125: This sentence is not clear, actually stating that the microbial activity has an  
181 influence on the microbial composition . . . Please, rephrase.

182 We agree and rephrased this part as follows:

183 “At the microscale, microbial activity such as photosynthesis and nitrogen fixation has  
184 a distinct influence on soil chemical parameters, e.g. the increase of carbon and  
185 nitrogen contents in oligotrophic soils (Ganzert et al., 2011; Cowan et al., 2011;  
186 Niederberger et al., 2015). In return, these changes in soil characteristics affect  
187 microbial community composition.” (L. 132-136)

188

189 Regional setting of James Ross Island, maritime Antarctica

190 Can be first subchapter of Material and Methods.

191 We moved the chapter "Regional setting of James Ross Island, maritime Antarctica"  
192 now as a new subchapter into the "Material and Methods" section.

193

194 I. 221: Please, indicate in what solution pH was measured.

195 EC and pH were measured in deionized water. Probably the wording was misleading.

196 Therefore, we substituted the word “solution” by “water”.

197

198 We changed the sentence as follows:

199 “Values of pH and electric conductivity were measured from bulk samples < 2mm in  
200 deionized water with a sample to water ratio of 1:2.5.” (L. 235-237).

201

202 I. 223-228: I do not understand how  $C_{inorg}$  (the abbreviation has not been introduced)  
203 can be measured by dry combustion after fumigation of the carbonates with HCl. I  
204 rather assume that Corg was measured and  $C_{inorg}$  was calculated by difference of  
205  $C_{tot}$  and Corg. Otherwise, methods are properly described.

206 Thank you for the important remark. We replaced “ $C_{inorg}$ ” with the more common term  
207 “TIC”. We also changed this part of the material and methods chapter to clarify this  
208 procedure:

209 “Carbon (C) and nitrogen (N) contents of the bulk soils were analyzed by dry  
210 combustion (Elementar CNS Vario Max Cube). 300 to 500mg per sample were  
211 analyzed in duplicate. In Order to distinguish between the total organic carbon (TOC)  
212 content and the total inorganic carbon (TIC), TIC was removed by acid fumigation after  
213 Ramnarine et al. (2011). 100 mg of the milled bulk soil samples were moistened with

214 20 to 40  $\mu\text{l}$  of deionized water and put into a desiccator together with 100ml of 37%  
215 HCl. Afterwards, the samples were dried at 40°C. Finally, the samples were measured  
216 again by dry combustion (EuroVector EuroEA3000 Elemental Analyser) to obtain the  
217 TOC content. TIC content was calculated:  $\text{TIC} = \text{C}_{\text{tot}} - \text{TOC}$ .” (L. 238-245)

218

219 I. 347: Why “virtually” unvegetated?

220 Many thanks, we deleted “virtually”. The sentence was changed as follows:

221 “Both sites were unvegetated by cryptogamic or vascular plants.” (L. 366-367)

222

223 I. 357-360: Since this property was not identified in the field I would shift this paragraph  
224 to the presentation of the micromorphological features.

225 We moved this paragraph as suggested:

226

227 I. 375-376: Present the TIC content as  $\text{mg g}^{-1}$ . How can a TIC content transform to a  
228 TOC content? Consider rewording.

229 We changed the units in  $\text{mg g}^{-1}$  for TOC and TIC. “Transform” is a wrong word; we  
230 rewrote this sentence:

231 “The TIC content was low in both soils ranging between 0.1 and 0.3  $\text{mg g}^{-1}$  in SMC and  
232 between 0.7 and 2.0  $\text{mg g}^{-1}$  in BB. The TOC content ranges from 0.8-0.9  $\text{mg g}^{-1}$  for  
233 SMC and from 1.4 and 2.6  $\text{mg g}^{-1}$  for BB and increased there slightly with depth.” (L.  
234 391-393)

235

236 I. 378-380: Is there any explanation for the very low C/N ratios, most often much lower  
237 than in microbial biomass?

238 Long periods of atmospheric deposition of salts in soil surfaces, the lack of leaching in  
239 arid areas and insignificant biological turnover may lead to comparably high nitrogen  
240 contents (Bockheim, 1997; Barrett et al., 2007). In combination with the generally low  
241 C contents, these relative high N contents might lead to C/N ratios that depart from  
242 biological stoichiometry. Similar C/N ratios have been observed in other Antarctic soil  
243 habitats (e.g. Ganzert et al., 2011, Arenz et al., 2011, Barrett et al., 2007), which  
244 indicates this to be a common observation in such environments.

245

246

247



248 I. 395: Move this sentence to the beginning of the paragraph.

249 We moved the sentence as suggested.

250

251 In I. 192 a strong wind ablation was mentioned at BB. What is the role of the stronger  
252 ablation of fine material at BB on the chemical soil parameters? Can the selective  
253 erosion of a particular particle size blurr the results of the different weathering indices?

254 Many thanks for your questions. We assume that the enrichment of pebbles at BB  
255 protect the finer material beneath them. However, a selective erosion of distinct grains  
256 sizes cannot be excluded, at least before the enrichment of coarser pebbles at the soil  
257 surface took place. The effect of selective erosion of fine particles is shown by the  
258 weathering indices, with lower CIA values in the top centimeters of both soil profiles.  
259 At BB, the influence of salts from sea spray is pronounced, with highest Na and Mg  
260 contents in the topsoils. We discussed this result as a rejuvenation effect of the  
261 weathering indices by salt input (L 534-536).

262

263 Further, we added the following sentence to the results section:

264 “The amount of coarse material > 2mm was larger at the profile BB. Deflation  
265 processes led to a residual enrichment of larger grains and pebbles at the soil surface  
266 of both profiles. The permafrost table was not reached in both soil profiles, but ground  
267 ice was visible in a depth of 85cm at SMC.” (L. 362-366)

268

269 I. 499-501: I would rewrite the sentence “Due to the absence of vascular plants, the  
270 ice-free area of JRI is a pristine laboratory and offers the exceptional opportunity to  
271 improve our understanding of the interrelations between soil formation and  
272 microbiological properties” as “The JRI offers an exceptional opportunity to improve  
273 our understanding of the interrelations between soil formation and microbiological  
274 properties in the absence of plants”.

275 Thank you very much, we follow your suggestion and wrote:

276 “James Ross Island offers an exceptional opportunity to improve our understanding of  
277 the interrelations between soil formation and microbiological properties in the absence  
278 of plants.” (L. 524-526)

279

280

281

282 I. 512-513: Present TOC and N contents as mg g<sup>-1</sup>.

283 We changed the units as follows:

284 “The examined soils on JRI were characterized by low TOC (0.9-2.6mg g<sup>-1</sup>) and low  
285 total nitrogen contents (approx. 0.4mg g<sup>-1</sup>), which is common for Antarctic soil  
286 environments (e.g. Cannone et al., 2008), and relative high pH values (7.4- 8.6).” (L.  
287 536-538)

288

289 I. 516-517: If low P contents refer to total P, then this cannot be taken to indicate a  
290 relative juvenility of the soils. Soils rather loose P with development than they gain. In  
291 the soils under study, there is no P input by birds and I assume that also the  
292 atmospheric P input is negligible.

293 Many thanks for this remark. We omitted “and P”. (L 541)

294

295 I. 557-561: Here, I do not understand the line of argumentation.

296 To clarify our line of argumentation, we rephrased the paragraph as follows:

297 “Interestingly, the relative abundances of these taxa changed according to the degree  
298 of weathering. This could indicate a possible interrelation between the occurrence of  
299 these potential weathering-related organisms and the degree of weathering of  
300 Antarctic soils. (L. 583-585)

301

302 I. 562-567: This part is quite speculative, but could have been easily proven. Why has  
303 Na not been leached before the total elemental analysis of the soil minerals? I cannot  
304 imagine the formation of stable secondary mineral phases entrapping Na.

305 Thanks for this comment. We conduct the XRF analyses generally with the total soil  
306 material. Leaching in advance of this analysis might leach also other elements than Na  
307 and change the results in an incalculable way. We added the results for Na from ion  
308 chromatography to Table 1. The results show that the amount of Na is significantly  
309 higher in BB, which is most likely because of Na input by sea spray. Regardless of its  
310 origin, Na is detected by XRF and therefore taken into account for the calculation of  
311 the CIA. For this reason, we cannot rule out the possibility that the CIA values for the  
312 BB location may be underestimated.

313

314

315

316 We adjusted the following sentences:

317 “Ion Chromatography results show that the Na content is significantly higher at BB.  
318 This difference is most likely caused by the increased input of salts due to sea spray,  
319 which is known to carry high amounts of Na (Udisti et al., 2012). Since the calculation  
320 of the CIA takes Na into account (Nesbitt & Young, 1982), the CIA values would be  
321 significantly higher if the additional input of sea salts could be excluded.” (L. 587-591)

322

323 l. 572-577: This is an important finding.

324 Many thanks.

325

326 l. 585-609: Nice discussion based on micromorphology.

327 Thank you very much as well.

328

329 l. 610-674: The discussion on the different taxa is well written, and it is a good message  
330 that this initial stage of soil development, chemolithoautotrophic lifestyles plays an  
331 important role for the generation of biomass and initial accumulation of soil organic  
332 carbon and nitrogen (even though this finding is not really new). But might be this offers  
333 also a good opportunity for an introduction, in order to base it better on a conceptual  
334 background.

335 Many thanks. At your advice, we added this to the introduction as follows:

336 “At the microscale, microbial activity such as photosynthesis and nitrogen fixation has  
337 a distinct influence on soil chemical parameters, e.g. the increase of carbon and  
338 nitrogen contents in oligotrophic soils (Ganzert et al., 2011; Cowan et al., 2011;  
339 Niederberger et al., 2015). In return, these changes in soil characteristics affect  
340 microbial community composition.” (L. 132-136)

341

## 342 **Additional Literature**

343

344 **Arenz, B., and Blanchette, R.:** Distribution and Abundance of Soil Fungi in Antarctica  
345 at Sites on the Peninsula, Ross Sea Region and Mcurdo Dry Valleys, Soil  
346 Biology and Biochemistry, 43, 308-315, 2011.

347 **Barrett, J. E., Virginia, R. A., Lyons, W. B., McKnight, D. M., Priscu, J. C., Doran,**  
348 **P. T., Fountain, A. G., Wall, D. H., and Moorhead, D.:** Biogeochemical  
349 Stoichiometry of Antarctic Dry Valley Ecosystems, Journal of Geophysical  
350 Research: Biogeosciences, 112, 2007.

351 **Prietzl, J., Prater, I., Colocho Hurtarte, L. C., Hrbáček, F., Klysubun, W., and**  
352 **Mueller, C. W.:** Site Conditions and Vegetation Determine Phosphorus and

353 Sulfur Speciation in Soils of Antarctica, *Geochimica et Cosmochimica Acta*, 246,  
354 339-362, <https://doi.org/10.1016/j.gca.2018.12.001>, 2019.  
355 **Ranjard L., Poly F., Combrisson J., Richaume A., Gour-bière F., Thioulouse J.,**  
356 **Nazaret S.:** Heterogeneous cell density and genetic structure of bacterial pools  
357 associated with various soil microenvironments as determined by enumeration  
358 and DNA fingerprint approach (RISA), *Microbiol.Ecol.*, 39, 263–272, 2000.
